# Supplementary material
Source: publisher figshare collection journal article supplement (https://karger.figshare.com/ndownloader/files/25755572)
Supplement: Supplementary file 1 [file 25755572]

**Supplemental Table.** Blood smear, End-tidal CO measurements, and CBC results during the first 12 weeks of life.

| Blood smear comments |  | Anisopoikilocytosis, polychromasia, abundant pyknocytes. | Few pyknocytes, polychromasia. | Minimal pyknocytes. |
| --- | --- | --- | --- | --- |
| End tidal CO |  | 2.3 ppm | <1.0 ppm |  |
| **CBC** |  | |  | |
| Age | 1 hour | 3 weeks | 9 weeks | 12 weeks |
| WBC (K/µL) | 17.5 | 13.0 | 6.2 | 8.2 |
| RBC (x 106/µL) | 2.78 | 4.33 | 4.02 | 3.74 |
| Hgb(g/dL) | 11.0 | 14.0 | 11.2 | 10.8 |
| Hematocrit (%) | 33.0 | 44.5 | 35.4 | 31.70 |
| MCV (fL) | 118.7 | 102.8 | 88.1 | 84.8 |
| MCH (pg) | 39.6 | 32.3 | 27.9 | 28.9 |
| MCHC (g/dL) | 33.3 | 31.5 | 31.6 | 34.1 |
| RDW-CV (%) | 13.9 | 23.8 | 21.3 | 17.7 |
| Platelets (K/µL) | 204 | 313 | Unable to report | 280 |
| Nucleated RBC (/100 WBC) | 2.1 | 12.4 | 0.0 | 0.0 |
| Reticulocyte number (K/µL) |  | 666.8 | 107.7 | 73.8 |
| Reticulocyte (%) |  | 15.4 | 2.68 | 2.00 |
| Retic-He (pg) |  | 25.3 | 32.2 | 34.4 |
| Micro-R (%) |  | 7.3 | 8.7 | 10.7 |
| Hypo-He (%) |  | 16.8 | 9.0 | 5.8 |
